# Supplementary material for: Multifunctional Nutrient-Binding Proteins Adapt Human Symbiotic Bacteria for Glycan Competition in the Gut by Separately Promoting Enhanced Sensing and Catalysis
Source: PubMed Central journal article supplement — mBio. 2014 Sep 9;5(5):e01441-14. doi: 10.1128/mBio.01441-14 (PMC4173775; doi:10.1128/mbio.01441-14), 2014-09-09
Supplement: mbo999101969st1.pdf [file mbo999101969st1.pdf]

**Table S1. Maltooligosaccharide concentration in amylopectin- pre and post dialysis by HPAEC (ng maltoOS per µg total carbohydrate)**

| <b>Starch</b>                | <b>G1</b> | <b>G2</b> | <b>G3</b> | <b>G4</b> | <b>G5</b> | <b>G6</b> | <b>G7</b> | <b>Total</b> |
|------------------------------|-----------|-----------|-----------|-----------|-----------|-----------|-----------|--------------|
| AP-maize<br>(pre dialysis)   | .392      | ND        | ND        | ND        | ND        | ND        | ND        | <b>0.392</b> |
| AP-potato<br>(pre dialysis)  | .228      | .17       | .286      | .676      | ND        | ND        | ND        | <b>1.36</b>  |
| AP-maize<br>(post dialysis)  | .174      | .17       | ND        | ND        | ND        | ND        | ND        | <b>0.344</b> |
| AP-potato<br>(post dialysis) | .282      | .12       | ND        | ND        | ND        | ND        | ND        | <b>0.402</b> |

ND = not detected
